# Supplementary material for: Systematic evaluation of computational tools to predict the effects of mutations on protein stability in the absence of experimental structures
Source: PubMed Central journal article supplement (PMC9155634; doi:10.1093/bib/bbac025), 2022-02-21
Supplement: supplementary_materials_bbac025.pdf [file supplementary_materials_bbac025.pdf]

## SUPPLEMENTARY MATERIALS

# Systematic evaluation of computational tools to predict the effects of mutations on protein stability in the absence of experimental structures

Qisheng Pan<sup>1,2,3</sup>, Thanh Binh Nguyen<sup>1,2,3</sup>, David B. Ascher<sup>1,2,3,4,\*</sup>, Douglas E.V. Pires<sup>1,2,3,5,\*</sup>

<sup>1</sup>Computational Biology and Clinical Informatics, Baker Heart and Diabetes Institute, Melbourne VIC 3004, Australia

<sup>2</sup>Department of Biochemistry and Molecular Biology, University of Melbourne, Melbourne, VIC 3010, Australia

<sup>3</sup>Systems and Computational Biology, Bio21 Institute, University of Melbourne, 30 Flemington Rd, Parkville VIC 3052, Australia

<sup>4</sup>Department of Biochemistry, University of Cambridge, 80 Tennis Ct Rd, Cambridge CB2 1GA, UK

<sup>5</sup>School of Computing and Information Systems, University of Melbourne, Melbourne, VIC 3053, Australia

\*To whom correspondence should be addressed D.E.V.P. Email: [douglas.pires@unimelb.edu.au](mailto:douglas.pires@unimelb.edu.au). Correspondence may also be addressed to D.B.A. Tel: +61 90354794; Email: [david.ascher@unimelb.edu.au](mailto:david.ascher@unimelb.edu.au).

### Performance metrics calculation

Four metrics to evaluate regression and classification performance respectively were used in this work, using the Python sci-kit learn and NumPy packages.

Here are the formulas for these four metrics.

1. Root mean square error (RMSE)

$$RMSE = \sqrt{\frac{(Y_{pred} - Y_{true})^2}{N}}$$

2. Pearson's Correlation Coefficient (R)

$$R = \frac{\sum(Y_{pred} - \bar{Y}_{pred})(Y_{true} - \bar{Y}_{true})}{\sqrt{\sum(Y_{pred} - \bar{Y}_{pred})^2} \sqrt{\sum(Y_{true} - \bar{Y}_{true})^2}}$$

Consider the following example confusion matrix.

|                  |          | Predicted condition |                     |
|------------------|----------|---------------------|---------------------|
|                  |          | Positive            | Negative            |
| Actual condition | Positive | True Positive (TP)  | False Negative (FN) |
|                  | Negative | False Positive (FP) | True Negative (TN)  |

3. Matthew Correlation Coefficient (MCC)

$$MCC = \frac{TP \times TN - FP \times FN}{\sqrt{(TP + FP)(TP + FN)(TN + FP)(TN + FN)}}$$

4. F1-score

$$F1 = \frac{2}{recall^{-1} + precision^{-1}} = \frac{2TP}{2TP + FP + FN}$$

## TABLES

**Table S1.** Description of the methods to predict effects of mutation on protein stability.

| Method         | Type             | Dataset                     | Implementation                                                                                                                                                                                                                                   | Source                                                                                                |
|----------------|------------------|-----------------------------|--------------------------------------------------------------------------------------------------------------------------------------------------------------------------------------------------------------------------------------------------|-------------------------------------------------------------------------------------------------------|
| mCSM-Stability | Machine learning | S2648,<br>S1925, <i>p53</i> | Structure-based method.<br>It can be run on the web server.<br>It usually takes less than 1 minute for each mutation, depending on the protein size.                                                                                             | <a href="http://biosig.unimelb.edu.au/mcsm/stability">http://biosig.unimelb.edu.au/mcsm/stability</a> |
| DUET           | Machine learning | S2648, <i>p53</i>           | Structure-based method.<br>It can be run on the web server.<br>It usually takes less than 1 minute for each mutation, depending on the protein size.                                                                                             | <a href="http://structure.bioc.cam.ac.uk/duet">http://structure.bioc.cam.ac.uk/duet</a>               |
| MAESTRO        | Machine learning | S2648,<br>S1925,<br>S1765,  | Structure-based method.<br>It can be run either on the web server or via a standalone software.<br>The standalone software usually takes less than 30 seconds for each mutation, depending on the protein size.                                  | <a href="http://biwww.che.sbg.ac.at/MAESTRO">http://biwww.che.sbg.ac.at/MAESTRO</a>                   |
| DynaMut        | Machine learning | S2648, S350                 | Structure-based method.<br>It can be run on the web server, and provides 5 prediction results including mCSM-stability, DUET, ENCoM, SDM, and DynaMut.<br>It usually takes less than 5 minutes for each mutation, depending on the protein size. | <a href="http://biosig.unimelb.edu.au/dynamut/">http://biosig.unimelb.edu.au/dynamut/</a>             |
| DynaMut2       | Machine learning | S2648, S276,<br>S173        | Structure-based method.<br>It can be easily accessed on the web server or via an API.<br>It usually takes less than 1 minute for each mutation, depending on the protein size.                                                                   | <a href="http://biosig.unimelb.edu.au/dynamut2/">http://biosig.unimelb.edu.au/dynamut2/</a>           |
| I-Mutant 2.0   | Machine learning | 2087                        | Structure- and sequence-based method.                                                                                                                                                                                                            | <a href="https://folding.biofold.org/cgi-bin/i-">https://folding.biofold.org/cgi-bin/i-</a>           |

|            |                  |                                            |                                                                                                                                                                                                                                                        |                                                                                                                       |
|------------|------------------|--------------------------------------------|--------------------------------------------------------------------------------------------------------------------------------------------------------------------------------------------------------------------------------------------------------|-----------------------------------------------------------------------------------------------------------------------|
|            |                  | mutations                                  | <p>It can be run either on the web server or via Python scripting.</p> <p>The standalone package usually takes less than 30 seconds for each mutation, depending on the protein size.</p>                                                              | mutant2.0.cgi                                                                                                         |
| SAAFEC-SEQ | Machine learning | S2648, S276,<br><i>p53</i> , PTEN,<br>TPMT | <p>Sequence-based method.</p> <p>It can be run either on the web server or via Python scripting.</p> <p>The standalone package usually takes around 20 minutes for each mutation if the <i>nr</i> database is used, depending on the protein size.</p> | <a href="http://compbio.clemson.edu/SAAFEC-SEQ/index.php">http://compbio.clemson.edu/SAAFEC-SEQ/index.php</a>         |
| MUpro      | Machine learning | S1615, S388                                | <p>Sequence-based methods.</p> <p>It can be run on the web server.</p> <p>It usually takes less than 1 minute for each mutation, depending on the protein size.</p>                                                                                    | <a href="http://mupro.proteomics.ics.uci.edu/">http://mupro.proteomics.ics.uci.edu/</a>                               |
| SDM        | Statistical      | S2648, S350,<br><i>p53</i> , S140          | <p>Structure-based method.</p> <p>It can be run on the web server.</p> <p>It usually takes less than 1 minute for each mutation, depending on the protein size.</p>                                                                                    | <a href="http://marid.bioc.cam.ac.uk/sdm2">http://marid.bioc.cam.ac.uk/sdm2</a>                                       |
| DDGun      | Statistical      | S2648,<br>VariBench,<br>Broom, <i>p53</i>  | <p>Structure- and sequence-based method.</p> <p>It can be run via Python scripting.</p> <p>The standalone package usually takes less than 3 minutes for each mutation, depending on the protein size.</p>                                              | <a href="http://folding.biofold.org/ddgun/predictions.tar.gz">http://folding.biofold.org/ddgun/predictions.tar.gz</a> |
| FoldX      | Energy function  | /                                          | <p>Structure-based method.</p> <p>It provides a standalone package for mutation effect prediction.</p> <p>It usually takes less than 1 minute for each mutation, depending on the protein size.</p>                                                    | <a href="http://foldxsuite.crg.eu/">http://foldxsuite.crg.eu/</a>                                                     |
| ENCoM      | Energy function  | /                                          | <p>Structure-based method.</p> <p>It can be run on the web server.</p> <p>It usually takes less than 1 minute for each mutation, depending on the protein size.</p>                                                                                    | <a href="http://bcf.med.usherbrooke.ca/encom">http://bcf.med.usherbrooke.ca/encom</a>                                 |

**Table S2.** The statistics of experimental  $\Delta\Delta G$  values (Kcal/mol) in each Iden dataset

| Identity (%) | Mean $\Delta\Delta G$ | Median $\Delta\Delta G$ | Minimum $\Delta\Delta G$ | Maximum $\Delta\Delta G$ | Standard deviation |
|--------------|-----------------------|-------------------------|--------------------------|--------------------------|--------------------|
| 15–25        | -0.91                 | -0.81                   | -5.00                    | 6.80                     | 1.53               |
| 25–35        | -0.94                 | -0.83                   | -5.00                    | 6.80                     | 1.59               |
| 35–45        | -0.85                 | -0.70                   | -5.00                    | 6.80                     | 1.52               |
| 45–55        | -0.84                 | -0.65                   | -5.00                    | 4.75                     | 1.52               |
| 55–65        | -0.72                 | -0.60                   | -4.99                    | 6.80                     | 1.55               |
| 65–75        | -0.87                 | -0.65                   | -5.00                    | 4.75                     | 1.52               |
| 75–85        | -1.02                 | -0.90                   | -4.98                    | 6.80                     | 1.49               |
| 85–95        | -1.06                 | -0.86                   | -5.00                    | 6.80                     | 1.47               |
| 100          | -1.02                 | -0.84                   | -5.00                    | 6.80                     | 1.49               |

**Table S3.** Performance comparison among raw, removing outliers, and removing homologs of homology model datasets in each identity range.

| Methods  | Identity range | RMSE (Kcal/mol) |                 |                     | Pearson's Correlation Coefficient |                 |                     | MCC          |                 |                     | F1-score     |                 |                     |
|----------|----------------|-----------------|-----------------|---------------------|-----------------------------------|-----------------|---------------------|--------------|-----------------|---------------------|--------------|-----------------|---------------------|
|          |                | raw             | Remove homologs | Remove 10% outliers | raw                               | Remove homologs | Remove 10% outliers | raw          | Remove homologs | Remove 10% outliers | raw          | Remove homologs | Remove 10% outliers |
| DynaMut2 | 15-25          | 1.340           | 1.374           | 0.994               | 0.530                             | 0.541           | 0.676               | 0.220        | 0.238           | 0.273               | 0.317        | 0.335           | 0.342               |
| DynaMut2 | 25-35          | 1.233           | 1.269           | 0.925               | 0.666                             | 0.652           | 0.772               | 0.319        | 0.306           | 0.374               | 0.399        | 0.396           | 0.438               |
| DynaMut2 | 35-45          | 1.228           | 1.241           | 0.888               | 0.637                             | 0.627           | 0.772               | 0.361        | 0.375           | 0.421               | 0.454        | 0.456           | 0.501               |
| DynaMut2 | 45-55          | 1.248           | 1.247           | 0.915               | 0.632                             | 0.635           | 0.774               | 0.333        | 0.339           | 0.404               | 0.433        | 0.442           | 0.484               |
| DynaMut2 | 55-65          | 1.230           | 1.229           | 0.901               | 0.662                             | 0.677           | 0.776               | 0.408        | 0.412           | 0.473               | <b>0.505</b> | 0.500           | 0.558               |
| DynaMut2 | 65-75          | 1.159           | 1.154           | 0.880               | 0.689                             | 0.709           | 0.802               | 0.354        | 0.376           | 0.410               | 0.457        | 0.476           | 0.499               |
| DynaMut2 | 75-85          | 1.162           | 1.194           | 0.891               | 0.650                             | 0.668           | 0.759               | <b>0.416</b> | 0.432           | 0.471               | 0.469        | 0.489           | 0.515               |
| DynaMut2 | 85-95          | <b>1.075</b>    | 1.066           | 0.783               | <b>0.697</b>                      | 0.687           | 0.812               | 0.379        | 0.349           | 0.415               | 0.444        | 0.421           | 0.479               |
| DynaMut2 | 100            | 1.027           | 1.025           | 0.766               | 0.729                             | 0.734           | 0.816               | 0.405        | 0.415           | 0.431               | 0.517        | 0.529           | 0.537               |
| FoldX    | 15-25          | 2.197           | 2.254           | 1.452               | 0.232                             | 0.206           | 0.506               | 0.192        | 0.195           | 0.261               | 0.448        | 0.467           | 0.491               |
| FoldX    | 25-35          | 2.198           | 2.153           | 1.305               | 0.323                             | 0.312           | 0.612               | 0.285        | 0.307           | 0.342               | 0.500        | 0.528           | 0.543               |
| FoldX    | 35-45          | 2.589           | 2.442           | 1.301               | 0.273                             | 0.325           | 0.595               | 0.274        | 0.314           | 0.334               | 0.491        | 0.532           | 0.534               |
| FoldX    | 45-55          | 2.809           | 3.008           | 1.297               | 0.257                             | 0.213           | 0.602               | 0.270        | 0.267           | 0.328               | 0.492        | 0.501           | 0.535               |
| FoldX    | 55-65          | 2.287           | 2.016           | 1.216               | 0.363                             | 0.396           | 0.655               | 0.357        | 0.360           | 0.403               | <b>0.574</b> | 0.577           | 0.607               |
| FoldX    | 65-75          | <b>1.820</b>    | 1.744           | 1.072               | <b>0.516</b>                      | 0.518           | 0.736               | 0.374        | 0.385           | 0.433               | 0.567        | 0.597           | 0.612               |
| FoldX    | 75-85          | 2.046           | 1.968           | 1.132               | 0.454                             | 0.488           | 0.696               | <b>0.388</b> | 0.429           | 0.428               | 0.545        | 0.577           | 0.577               |
| FoldX    | 85-95          | 2.125           | 2.176           | 1.042               | 0.416                             | 0.405           | 0.727               | 0.344        | 0.342           | 0.379               | 0.498        | 0.497           | 0.529               |

|              |       |              |       |       |              |       |       |              |       |       |              |       |       |
|--------------|-------|--------------|-------|-------|--------------|-------|-------|--------------|-------|-------|--------------|-------|-------|
| FoldX        | 100   | 2.076        | 1.819 | 1.056 | 0.438        | 0.513 | 0.736 | 0.379        | 0.395 | 0.435 | 0.532        | 0.551 | 0.575 |
| I-Mutant 2.0 | 15-25 | 1.440        | 1.434 | 1.063 | 0.458        | 0.497 | 0.649 | 0.280        | 0.346 | 0.368 | 0.429        | 0.479 | 0.492 |
| I-Mutant 2.0 | 25-35 | 1.438        | 1.408 | 1.053 | 0.498        | 0.530 | 0.680 | 0.283        | 0.337 | 0.370 | 0.433        | 0.481 | 0.497 |
| I-Mutant 2.0 | 35-45 | 1.219        | 1.197 | 0.817 | 0.620        | 0.629 | 0.794 | 0.464        | 0.499 | 0.571 | 0.583        | 0.615 | 0.666 |
| I-Mutant 2.0 | 45-55 | 1.245        | 1.235 | 0.844 | 0.614        | 0.627 | 0.786 | 0.456        | 0.472 | 0.543 | 0.586        | 0.590 | 0.651 |
| I-Mutant 2.0 | 55-65 | 1.268        | 1.237 | 0.853 | 0.597        | 0.629 | 0.781 | 0.420        | 0.480 | 0.513 | 0.579        | 0.624 | 0.645 |
| I-Mutant 2.0 | 65-75 | 1.175        | 1.179 | 0.805 | 0.648        | 0.649 | 0.802 | 0.489        | 0.542 | 0.553 | 0.614        | 0.652 | 0.664 |
| I-Mutant 2.0 | 75-85 | <b>1.092</b> | 1.192 | 0.727 | <b>0.704</b> | 0.671 | 0.857 | <b>0.531</b> | 0.556 | 0.628 | <b>0.636</b> | 0.657 | 0.709 |
| I-Mutant 2.0 | 85-95 | 1.178        | 1.157 | 0.814 | 0.645        | 0.651 | 0.807 | 0.417        | 0.415 | 0.481 | 0.545        | 0.547 | 0.595 |
| I-Mutant 2.0 | 100   | 1.219        | 1.259 | 0.832 | 0.616        | 0.601 | 0.789 | 0.408        | 0.417 | 0.490 | 0.526        | 0.541 | 0.589 |
| MAESTRO      | 15-25 | 1.324        | 1.342 | 0.996 | 0.539        | 0.545 | 0.677 | 0.262        | 0.260 | 0.311 | 0.453        | 0.460 | 0.481 |
| MAESTRO      | 25-35 | 1.270        | 1.228 | 0.932 | 0.615        | 0.637 | 0.745 | 0.342        | 0.343 | 0.395 | 0.504        | 0.513 | 0.538 |
| MAESTRO      | 35-45 | 1.234        | 1.187 | 0.877 | 0.594        | 0.613 | 0.739 | 0.375        | 0.380 | 0.421 | 0.537        | 0.549 | 0.568 |
| MAESTRO      | 45-55 | 1.280        | 1.202 | 0.925 | 0.567        | 0.606 | 0.722 | 0.351        | 0.372 | 0.407 | 0.531        | 0.548 | 0.569 |
| MAESTRO      | 55-65 | 1.258        | 1.254 | 0.899 | 0.595        | 0.605 | 0.742 | 0.385        | 0.408 | 0.439 | <b>0.568</b> | 0.587 | 0.602 |
| MAESTRO      | 65-75 | 1.251        | 1.167 | 0.898 | 0.588        | 0.638 | 0.742 | 0.349        | 0.378 | 0.401 | 0.521        | 0.550 | 0.555 |
| MAESTRO      | 75-85 | 1.178        | 1.155 | 0.855 | 0.628        | 0.663 | 0.763 | 0.390        | 0.404 | 0.426 | 0.522        | 0.528 | 0.547 |
| MAESTRO      | 85-95 | <b>1.168</b> | 1.116 | 0.838 | <b>0.638</b> | 0.660 | 0.761 | <b>0.410</b> | 0.408 | 0.452 | 0.543        | 0.542 | 0.576 |
| MAESTRO      | 100   | 1.268        | 1.197 | 0.893 | 0.570        | 0.625 | 0.744 | 0.334        | 0.364 | 0.385 | 0.487        | 0.512 | 0.524 |
| DynaMut1     | 15-25 | 1.441        | 1.459 | 1.104 | 0.472        | 0.469 | 0.610 | 0.182        | 0.187 | 0.223 | 0.413        | 0.432 | 0.439 |
| DynaMut1     | 25-35 | 1.393        | 1.360 | 1.048 | 0.562        | 0.559 | 0.688 | 0.282        | 0.294 | 0.323 | 0.490        | 0.509 | 0.518 |

|          |       |              |       |       |              |       |       |              |       |       |              |       |       |
|----------|-------|--------------|-------|-------|--------------|-------|-------|--------------|-------|-------|--------------|-------|-------|
| DynaMut1 | 35-45 | 1.365        | 1.339 | 0.985 | 0.526        | 0.507 | 0.679 | 0.307        | 0.306 | 0.356 | 0.514        | 0.522 | 0.549 |
| DynaMut1 | 45-55 | 1.381        | 1.315 | 1.009 | 0.514        | 0.526 | 0.668 | 0.241        | 0.245 | 0.289 | 0.473        | 0.486 | 0.507 |
| DynaMut1 | 55-65 | 1.350        | 1.343 | 0.976 | 0.551        | 0.560 | 0.697 | 0.316        | 0.313 | 0.360 | <b>0.547</b> | 0.547 | 0.577 |
| DynaMut1 | 65-75 | <b>1.310</b> | 1.220 | 0.962 | 0.577        | 0.606 | 0.722 | 0.313        | 0.353 | 0.377 | 0.520        | 0.555 | 0.565 |
| DynaMut1 | 75-85 | 1.377        | 1.381 | 1.017 | 0.532        | 0.546 | 0.680 | <b>0.331</b> | 0.338 | 0.374 | 0.509        | 0.519 | 0.545 |
| DynaMut1 | 85-95 | 1.324        | 1.304 | 0.990 | <b>0.584</b> | 0.583 | 0.690 | 0.238        | 0.227 | 0.262 | 0.426        | 0.418 | 0.450 |
| DynaMut1 | 100   | 1.363        | 1.322 | 0.994 | 0.592        | 0.608 | 0.737 | 0.331        | 0.361 | 0.381 | 0.507        | 0.536 | 0.552 |
| ENCoM    | 15-25 | 1.642        | 1.659 | 1.280 | 0.279        | 0.254 | 0.334 | 0.070        | 0.073 | 0.087 | 0.327        | 0.345 | 0.345 |
| ENCoM    | 25-35 | 1.689        | 1.648 | 1.291 | 0.323        | 0.290 | 0.432 | 0.192        | 0.213 | 0.195 | 0.413        | 0.436 | 0.425 |
| ENCoM    | 35-45 | 1.612        | 1.574 | 1.198 | 0.299        | 0.251 | 0.403 | 0.184        | 0.156 | 0.202 | 0.427        | 0.420 | 0.445 |
| ENCoM    | 45-55 | 1.628        | 1.574 | 1.206 | 0.265        | 0.232 | 0.391 | 0.124        | 0.097 | 0.142 | 0.390        | 0.382 | 0.411 |
| ENCoM    | 55-65 | <b>1.581</b> | 1.591 | 1.171 | 0.340        | 0.324 | 0.414 | 0.179        | 0.167 | 0.178 | <b>0.450</b> | 0.442 | 0.460 |
| ENCoM    | 65-75 | 1.587        | 1.513 | 1.195 | <b>0.365</b> | 0.351 | 0.423 | 0.190        | 0.235 | 0.206 | 0.421        | 0.457 | 0.443 |
| ENCoM    | 75-85 | 1.654        | 1.674 | 1.277 | 0.331        | 0.338 | 0.436 | <b>0.201</b> | 0.178 | 0.223 | 0.416        | 0.402 | 0.441 |
| ENCoM    | 85-95 | 1.642        | 1.616 | 1.227 | 0.353        | 0.337 | 0.405 | 0.155        | 0.105 | 0.157 | 0.366        | 0.327 | 0.377 |
| ENCoM    | 100   | 1.682        | 1.663 | 1.278 | 0.292        | 0.287 | 0.363 | 0.137        | 0.164 | 0.140 | 0.371        | 0.393 | 0.385 |
| DUET     | 15-25 | 1.301        | 1.320 | 0.968 | 0.545        | 0.556 | 0.692 | 0.299        | 0.320 | 0.358 | 0.457        | 0.471 | 0.494 |
| DUET     | 25-35 | 1.198        | 1.201 | 0.883 | 0.662        | 0.658 | 0.783 | 0.397        | 0.388 | 0.445 | 0.540        | 0.543 | 0.572 |
| DUET     | 35-45 | 1.176        | 1.174 | 0.844 | 0.638        | 0.629 | 0.775 | 0.387        | 0.398 | 0.430 | 0.530        | 0.543 | 0.564 |
| DUET     | 45-55 | 1.170        | 1.152 | 0.854 | 0.648        | 0.651 | 0.781 | 0.399        | 0.381 | 0.442 | 0.553        | 0.545 | 0.584 |
| DUET     | 55-65 | 1.161        | 1.160 | 0.844 | 0.665        | 0.674 | 0.779 | 0.441        | 0.449 | 0.484 | <b>0.594</b> | 0.600 | 0.621 |



|      |       |              |       |       |              |       |       |              |       |       |              |       |       |
|------|-------|--------------|-------|-------|--------------|-------|-------|--------------|-------|-------|--------------|-------|-------|
| DUET | 65-75 | 1.129        | 1.097 | 0.842 | <b>0.676</b> | 0.697 | 0.795 | 0.414        | 0.431 | 0.442 | 0.565        | 0.587 | 0.584 |
| DUET | 75-85 | 1.135        | 1.148 | 0.838 | 0.654        | 0.671 | 0.783 | <b>0.460</b> | 0.463 | 0.503 | 0.567        | 0.569 | 0.602 |
| DUET | 85-95 | <b>1.106</b> | 1.097 | 0.802 | 0.670        | 0.661 | 0.796 | 0.408        | 0.397 | 0.436 | 0.529        | 0.520 | 0.553 |
| DUET | 100   | 1.087        | 1.106 | 0.799 | 0.691        | 0.683 | 0.802 | 0.444        | 0.430 | 0.465 | 0.567        | 0.565 | 0.584 |
| mCSM | 15-25 | 1.303        | 1.333 | 0.964 | 0.525        | 0.537 | 0.663 | 0.232        | 0.271 | 0.277 | 0.309        | 0.329 | 0.329 |
| mCSM | 25-35 | 1.206        | 1.216 | 0.896 | 0.663        | 0.657 | 0.746 | 0.296        | 0.274 | 0.318 | 0.360        | 0.350 | 0.376 |
| mCSM | 35-45 | 1.188        | 1.188 | 0.855 | 0.627        | 0.621 | 0.744 | 0.338        | 0.320 | 0.393 | 0.417        | 0.394 | 0.464 |
| mCSM | 45-55 | 1.186        | 1.169 | 0.874 | 0.632        | 0.637 | 0.744 | 0.340        | 0.335 | 0.393 | 0.422        | 0.415 | 0.466 |
| mCSM | 55-65 | 1.176        | 1.176 | 0.860 | 0.664        | 0.679 | 0.751 | 0.392        | 0.373 | 0.427 | <b>0.482</b> | 0.455 | 0.511 |
| mCSM | 65-75 | 1.141        | 1.107 | 0.866 | 0.668        | 0.700 | 0.769 | 0.335        | 0.345 | 0.363 | 0.425        | 0.439 | 0.442 |
| mCSM | 75-85 | 1.136        | 1.142 | 0.849 | 0.649        | 0.673 | 0.748 | <b>0.425</b> | 0.410 | 0.452 | 0.441        | 0.437 | 0.466 |
| mCSM | 85-95 | <b>1.089</b> | 1.073 | 0.800 | <b>0.674</b> | 0.667 | 0.768 | 0.363        | 0.314 | 0.383 | 0.411        | 0.368 | 0.433 |
| mCSM | 100   | 1.084        | 1.098 | 0.798 | 0.692        | 0.688 | 0.773 | 0.398        | 0.372 | 0.419 | 0.447        | 0.434 | 0.468 |
| SDM  | 15-25 | 1.561        | 1.561 | 1.188 | 0.433        | 0.447 | 0.619 | 0.192        | 0.220 | 0.250 | 0.429        | 0.451 | 0.468 |
| SDM  | 25-35 | 1.584        | 1.546 | 1.198 | 0.465        | 0.485 | 0.645 | 0.267        | 0.289 | 0.334 | 0.480        | 0.506 | 0.526 |
| SDM  | 35-45 | 1.559        | 1.540 | 1.201 | 0.426        | 0.432 | 0.599 | 0.226        | 0.283 | 0.288 | 0.458        | 0.514 | 0.501 |
| SDM  | 45-55 | <b>1.501</b> | 1.452 | 1.145 | <b>0.467</b> | 0.494 | 0.640 | 0.305        | 0.336 | 0.376 | 0.520        | 0.553 | 0.571 |
| SDM  | 55-65 | 1.557        | 1.576 | 1.153 | 0.433        | 0.439 | 0.626 | 0.303        | 0.345 | 0.387 | <b>0.533</b> | 0.564 | 0.585 |
| SDM  | 65-75 | 1.516        | 1.498 | 1.175 | 0.466        | 0.483 | 0.629 | <b>0.312</b> | 0.340 | 0.374 | 0.525        | 0.557 | 0.569 |
| SDM  | 75-85 | 1.541        | 1.533 | 1.178 | 0.452        | 0.476 | 0.634 | 0.297        | 0.343 | 0.369 | 0.485        | 0.521 | 0.538 |
| SDM  | 85-95 | 1.565        | 1.555 | 1.194 | 0.429        | 0.432 | 0.599 | 0.243        | 0.272 | 0.302 | 0.439        | 0.461 | 0.486 |

|       |       |              |       |       |              |       |       |              |       |       |              |       |       |
|-------|-------|--------------|-------|-------|--------------|-------|-------|--------------|-------|-------|--------------|-------|-------|
| SDM   | 100   | 1.545        | 1.553 | 1.175 | 0.455        | 0.455 | 0.633 | 0.248        | 0.263 | 0.307 | 0.450        | 0.472 | 0.496 |
| DDGun | 15-25 | 1.352        | 1.359 | 0.991 | 0.579        | 0.580 | 0.745 | 0.330        | 0.344 | 0.382 | 0.531        | 0.553 | 0.568 |
| DDGun | 25-35 | 1.359        | 1.342 | 0.998 | 0.613        | 0.605 | 0.767 | <b>0.334</b> | 0.347 | 0.387 | 0.530        | 0.555 | 0.568 |
| DDGun | 35-45 | 1.362        | 1.342 | 0.978 | 0.566        | 0.545 | 0.742 | 0.284        | 0.284 | 0.344 | 0.502        | 0.519 | 0.544 |
| DDGun | 45-55 | 1.339        | 1.278 | 0.982 | 0.590        | 0.597 | 0.751 | 0.311        | 0.318 | 0.364 | 0.525        | 0.542 | 0.563 |
| DDGun | 55-65 | 1.402        | 1.376 | 1.015 | 0.563        | 0.572 | 0.737 | 0.300        | 0.321 | 0.361 | <b>0.536</b> | 0.553 | 0.579 |
| DDGun | 65-75 | <b>1.269</b> | 1.229 | 0.933 | <b>0.621</b> | 0.621 | 0.772 | 0.305        | 0.309 | 0.356 | 0.520        | 0.540 | 0.555 |
| DDGun | 75-85 | 1.390        | 1.389 | 1.009 | 0.540        | 0.551 | 0.719 | 0.290        | 0.312 | 0.347 | 0.484        | 0.503 | 0.527 |
| DDGun | 85-95 | 1.371        | 1.372 | 0.997 | 0.566        | 0.538 | 0.733 | 0.234        | 0.224 | 0.286 | 0.431        | 0.425 | 0.474 |
| DDGun | 100   | 1.352        | 1.359 | 0.987 | 0.578        | 0.570 | 0.741 | 0.263        | 0.267 | 0.313 | 0.459        | 0.473 | 0.499 |

\* The values with red and bold label represent the best regression/classification performance of a certain predictive method across all identity ranges.

\* Identity 100 represents the experimental inputs.

## FIGURES

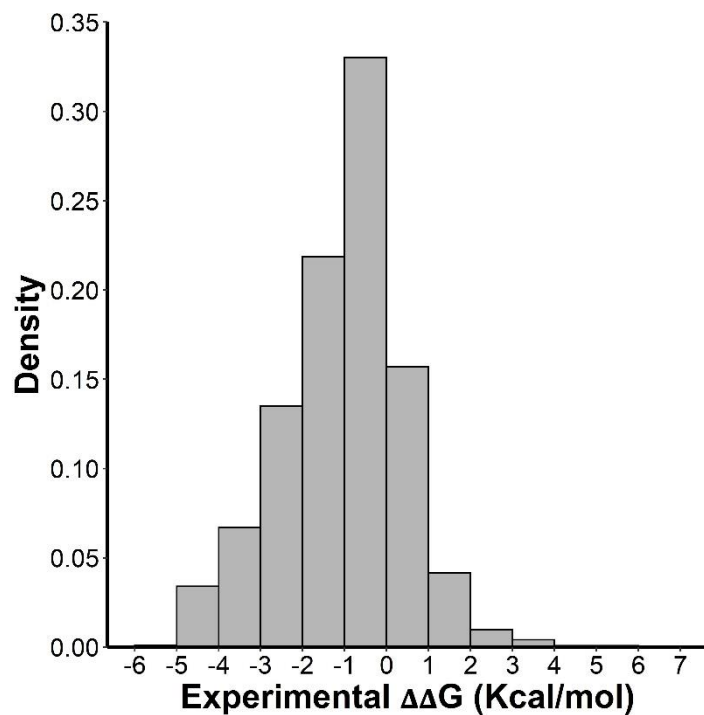

**Figure S1.** Distribution of the change of Gibbs free energy ( $\Delta\Delta G$ ) for the S2648 dataset.

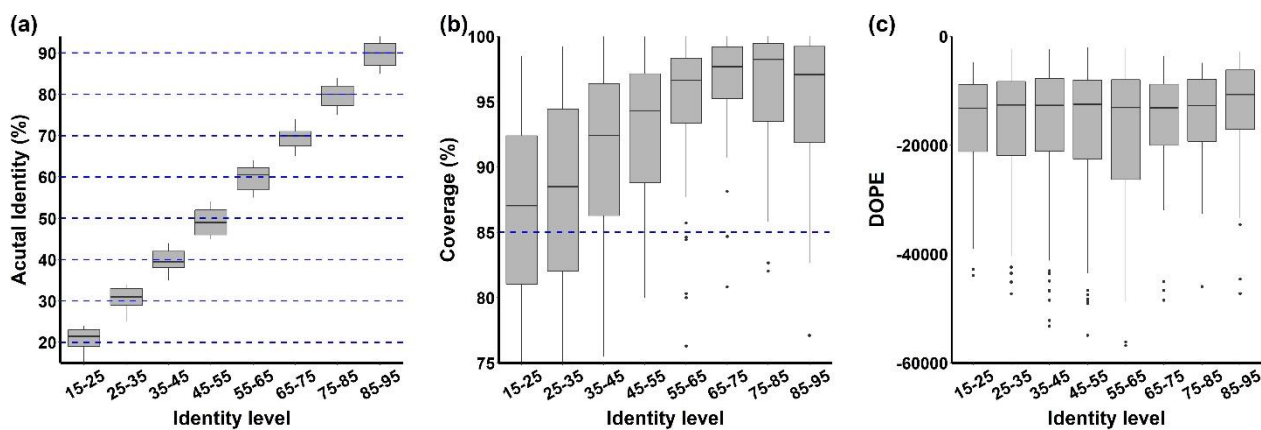

**Figure S2.** Distribution of (a) actual identity in each identity range, (b) coverage of homology models and (c) model quality assessed via DOPE score. Blue dashed lines in (a) showed the designed identity for each dataset, while in (b) presented the 85% coverage cutoff for all the models.

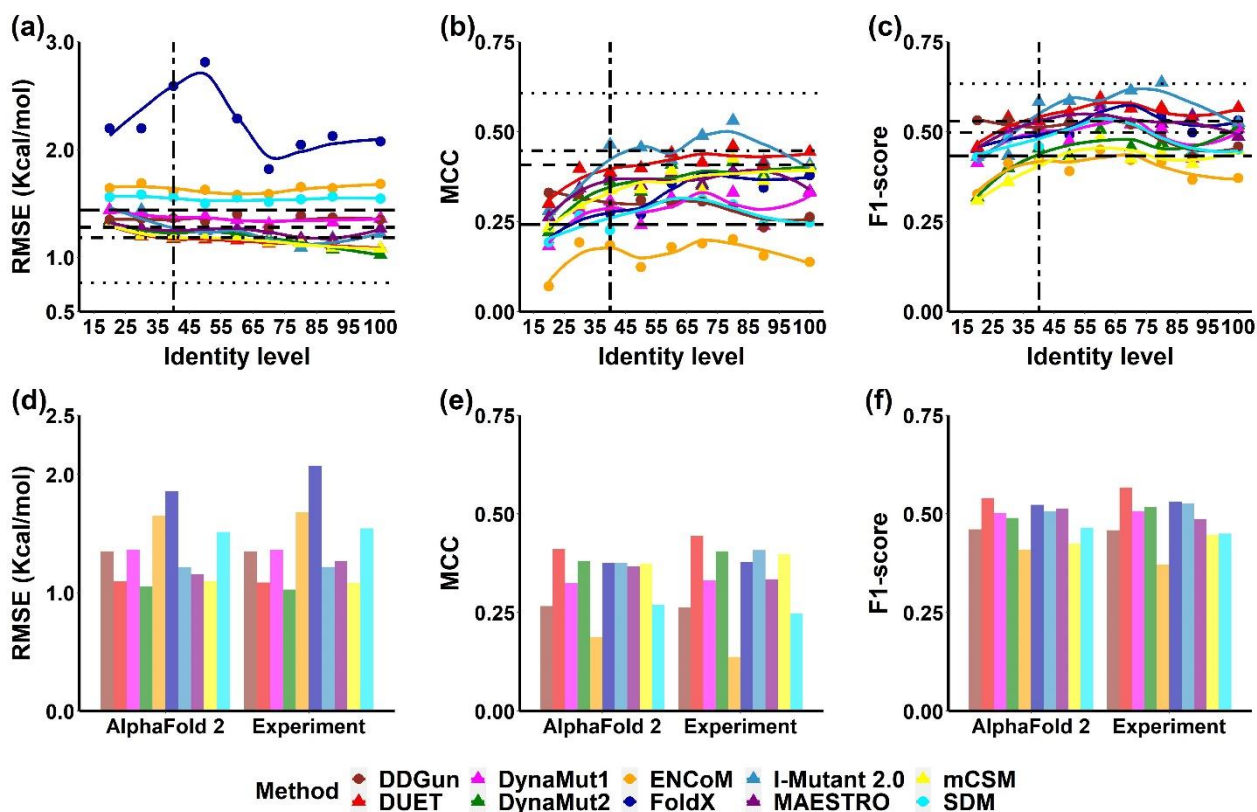

**Figure S3.** Overall performance trends based on RMSE, MCC and F1-score of ten methods predicting mutation effects on protein stability, namely DDGun (brown), DUET (red), DynaMut1 (pink), DynaMut2 (green), ENCoM (orange), FoldX (blue), I-Mutant 2.0 (light blue), MAESTRO (purple), mCSM-Stability (yellow), and SDM (cyan) on homology models (a-c) and AlphaFold2 models (d-f). The metrics values and their trends are represented in dots and lines, respectively. A vertical long-dashed line indicates the proposed identity cutoff for homology modelling, while the horizontal lines are the baseline performance of four sequence-based methods, namely SAAFEC-SEQ (dotted), MUpro (dot-dashed), I-Mutant (dashed), and DDGun (long-dashed).

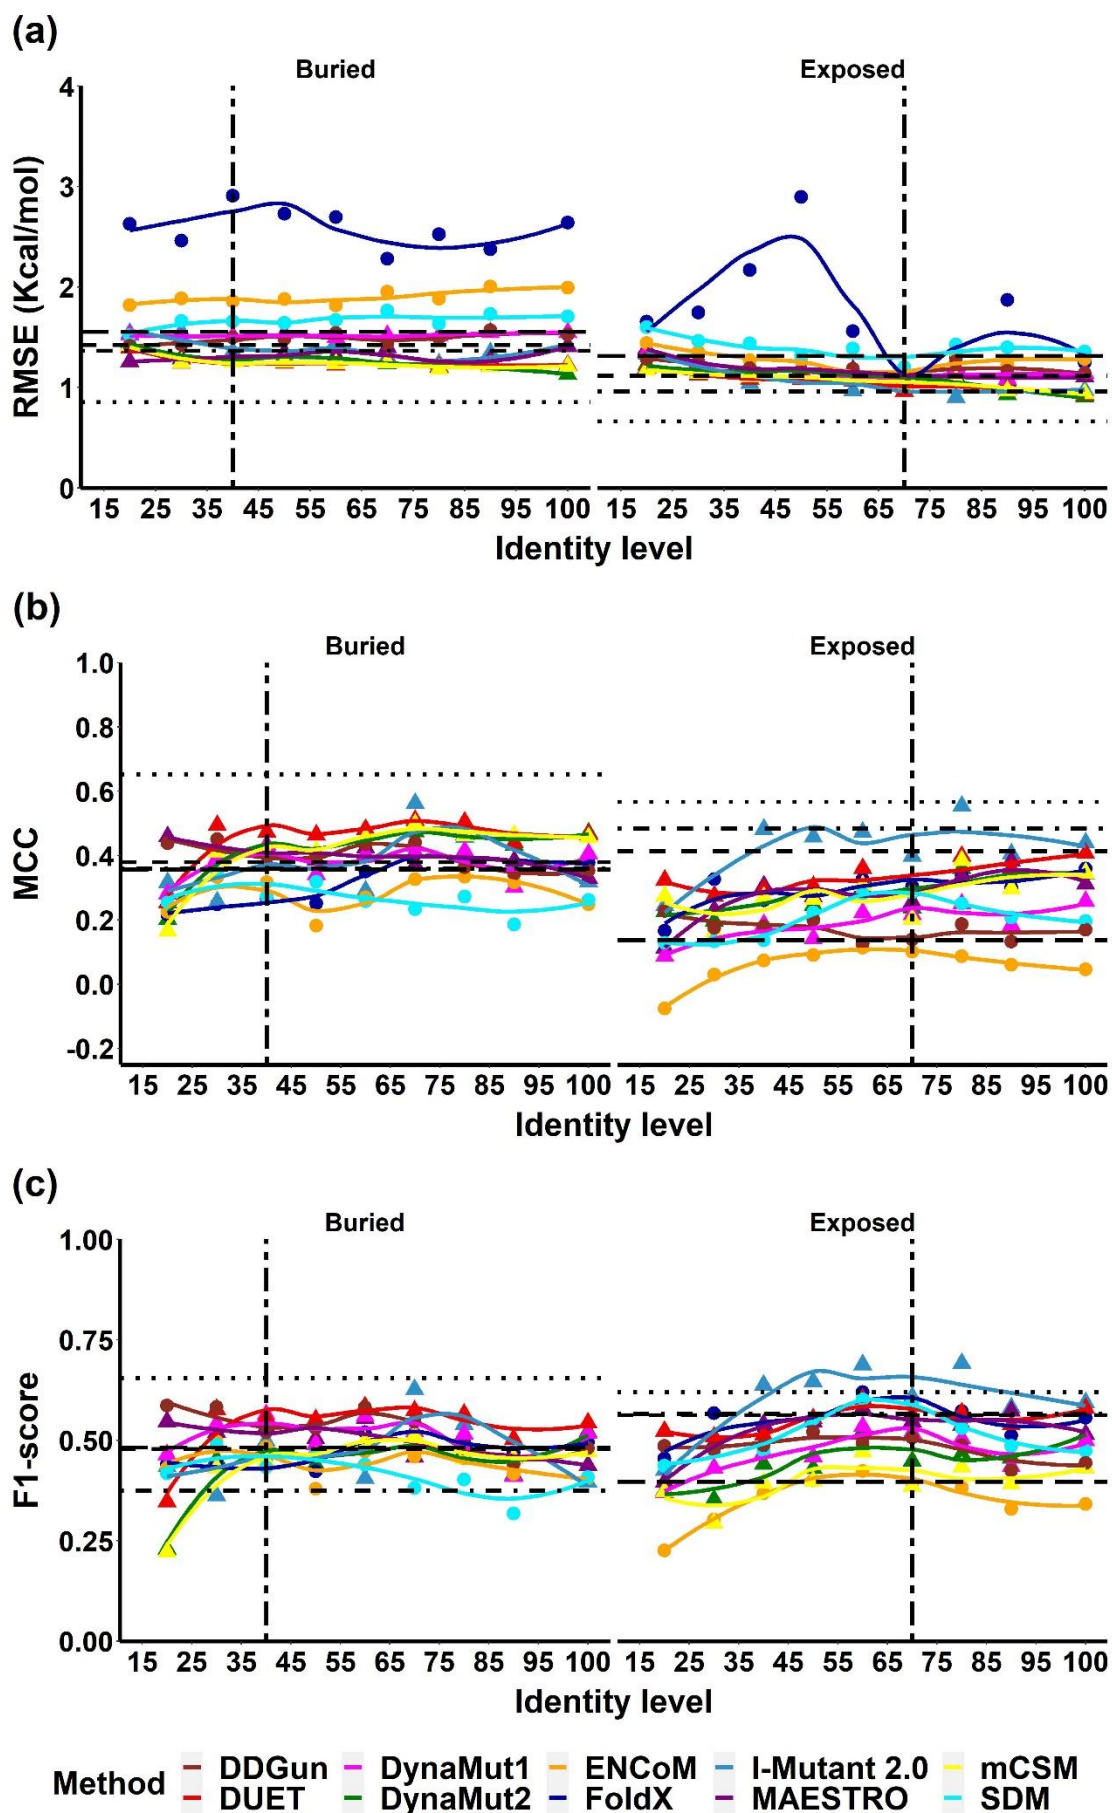

**Figure S4.** Performance trends based on (a) RMSE, (b) MCC and (c) F1-score for ten methods used to predict mutation effects on protein stability using homology models as input structures on buried vs. exposed residues.

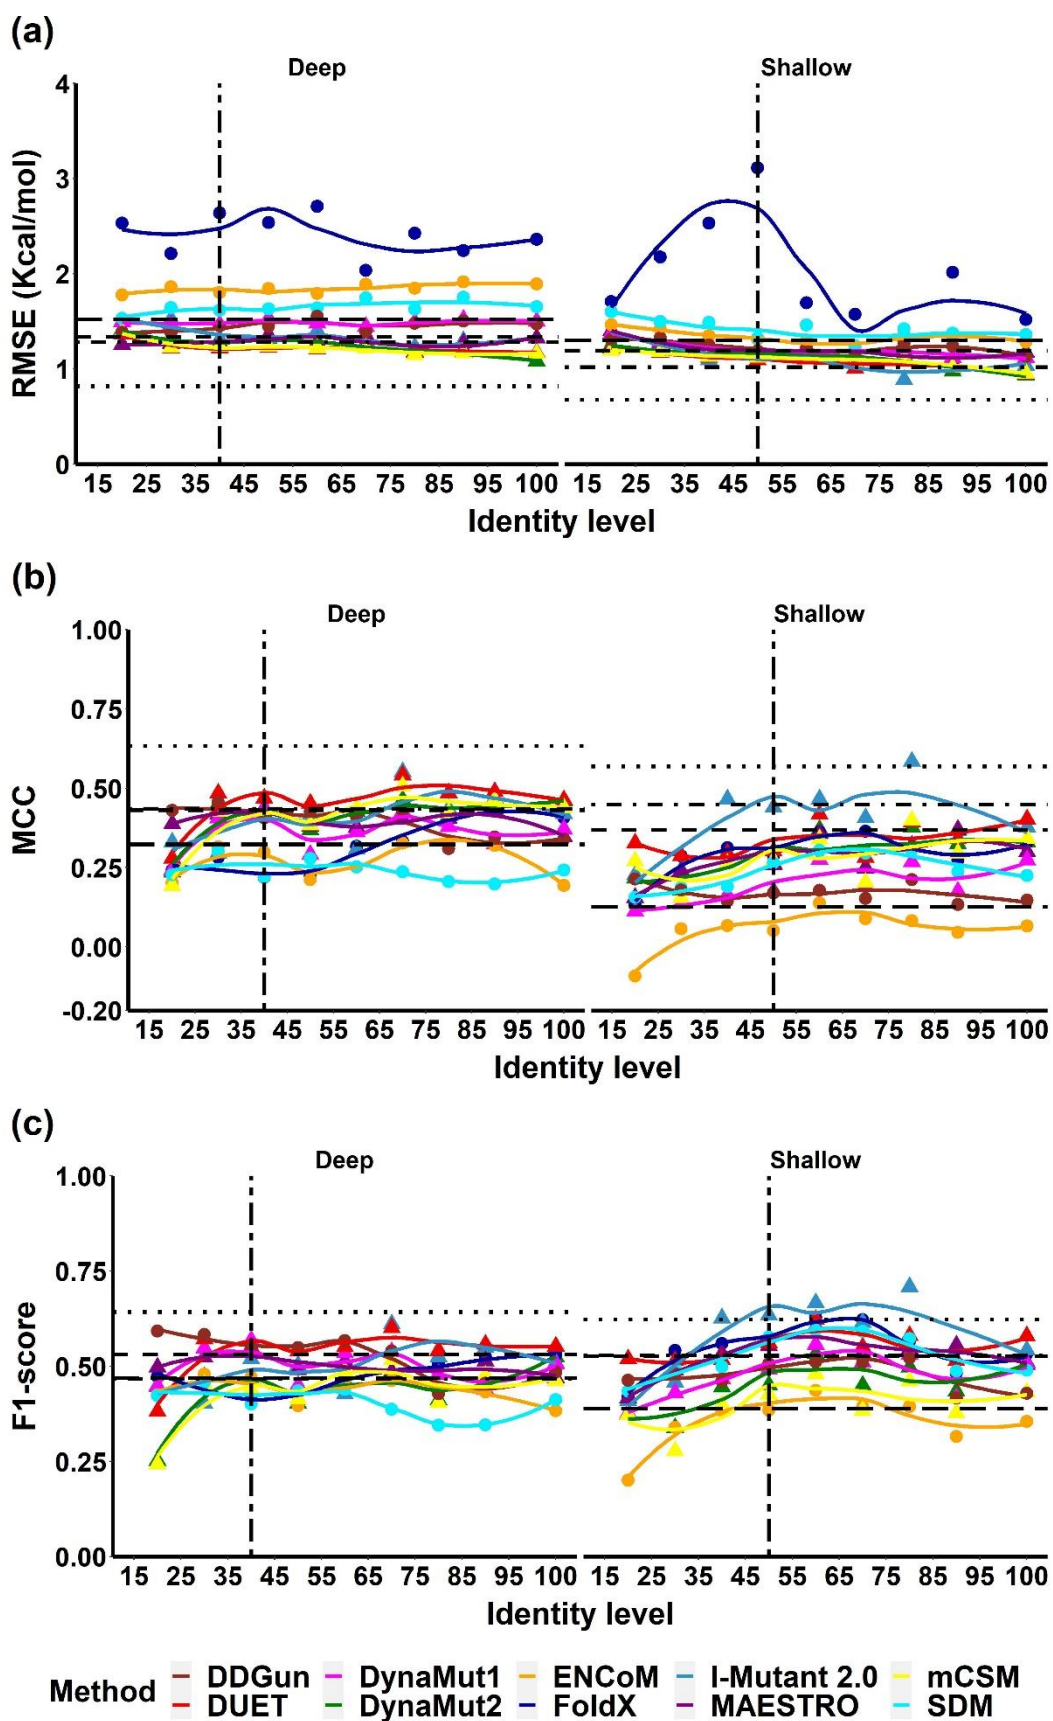

**Figure S5.** Performance trends based on (a) RMSE, (b) MCC and (c) F1-score for ten methods used to predict mutation effects on protein stability using homology models as input structures on deep vs. shallow residues.



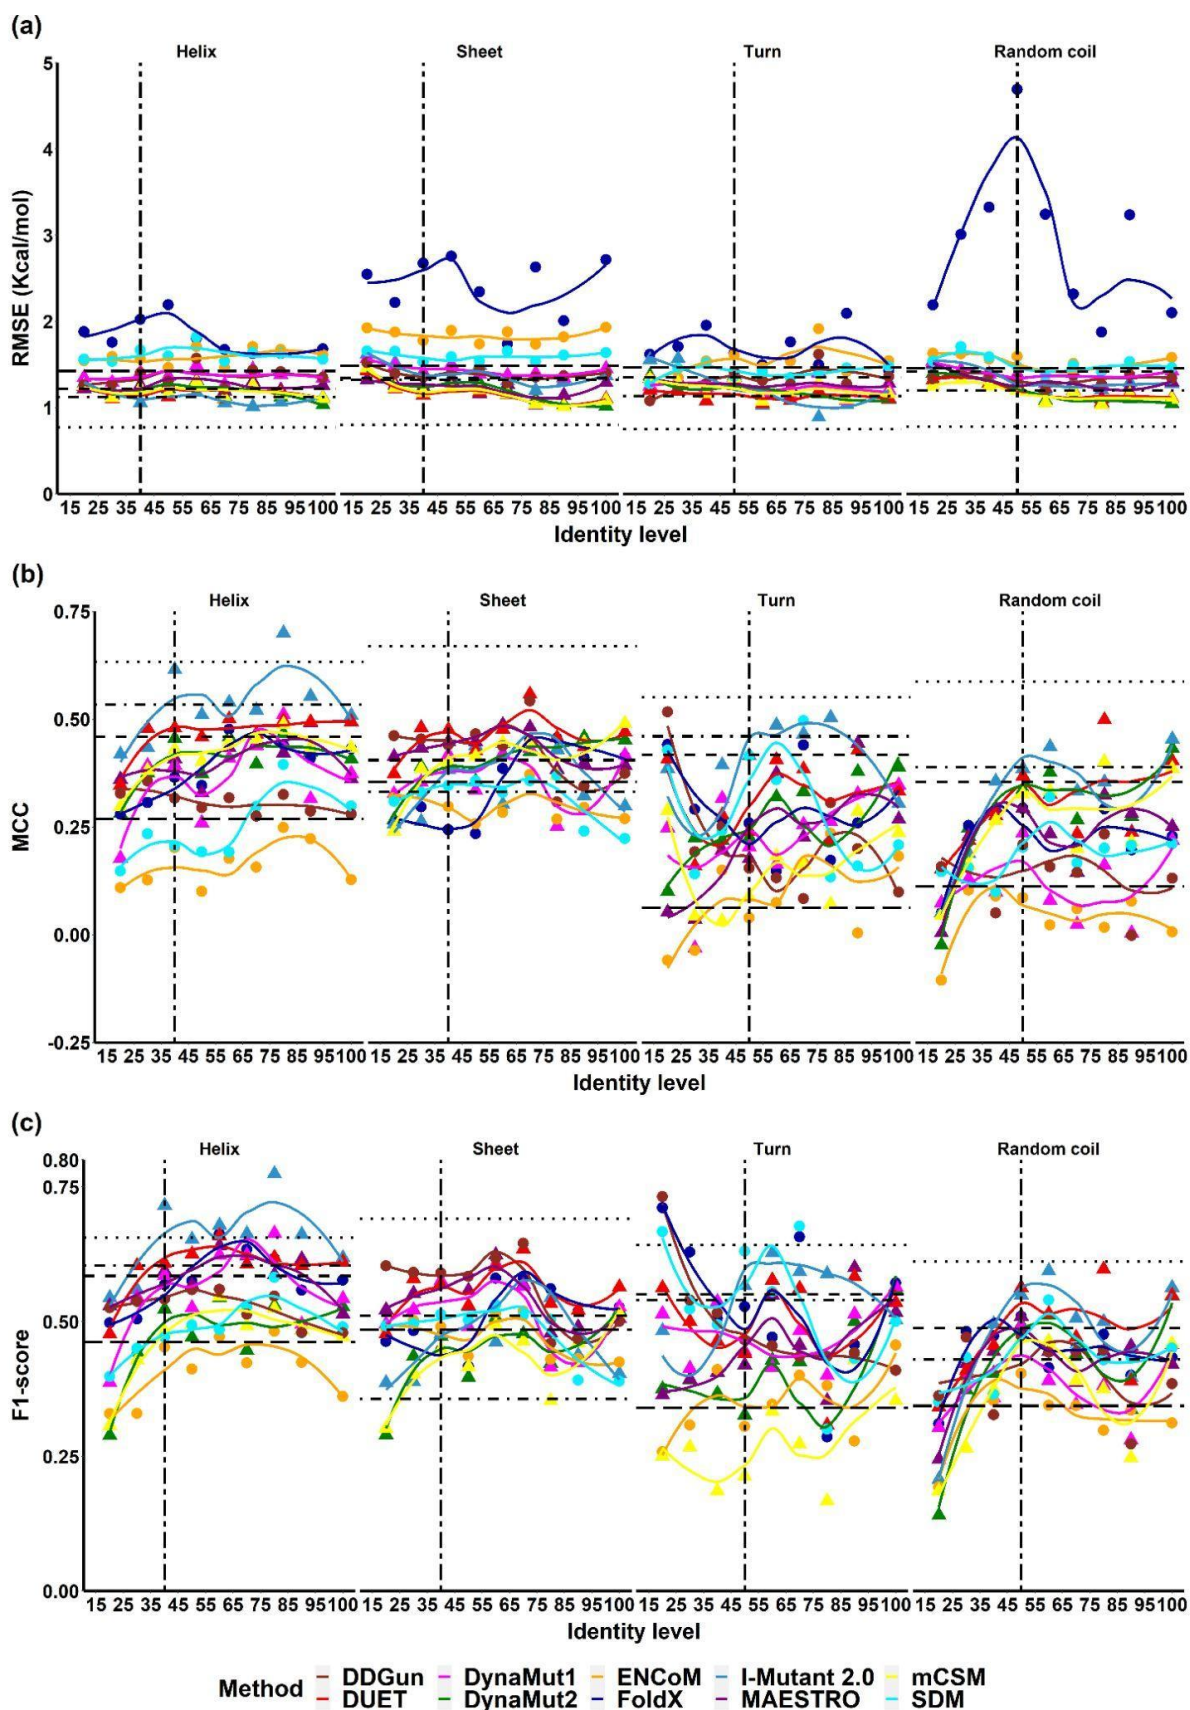

**Figure S6.** Performance trends based on (a) RMSE, (b) MCC and (c) F1-score for ten methods used to predict mutation effects on protein stability using homology models as input structures on residues in four secondary structure types.

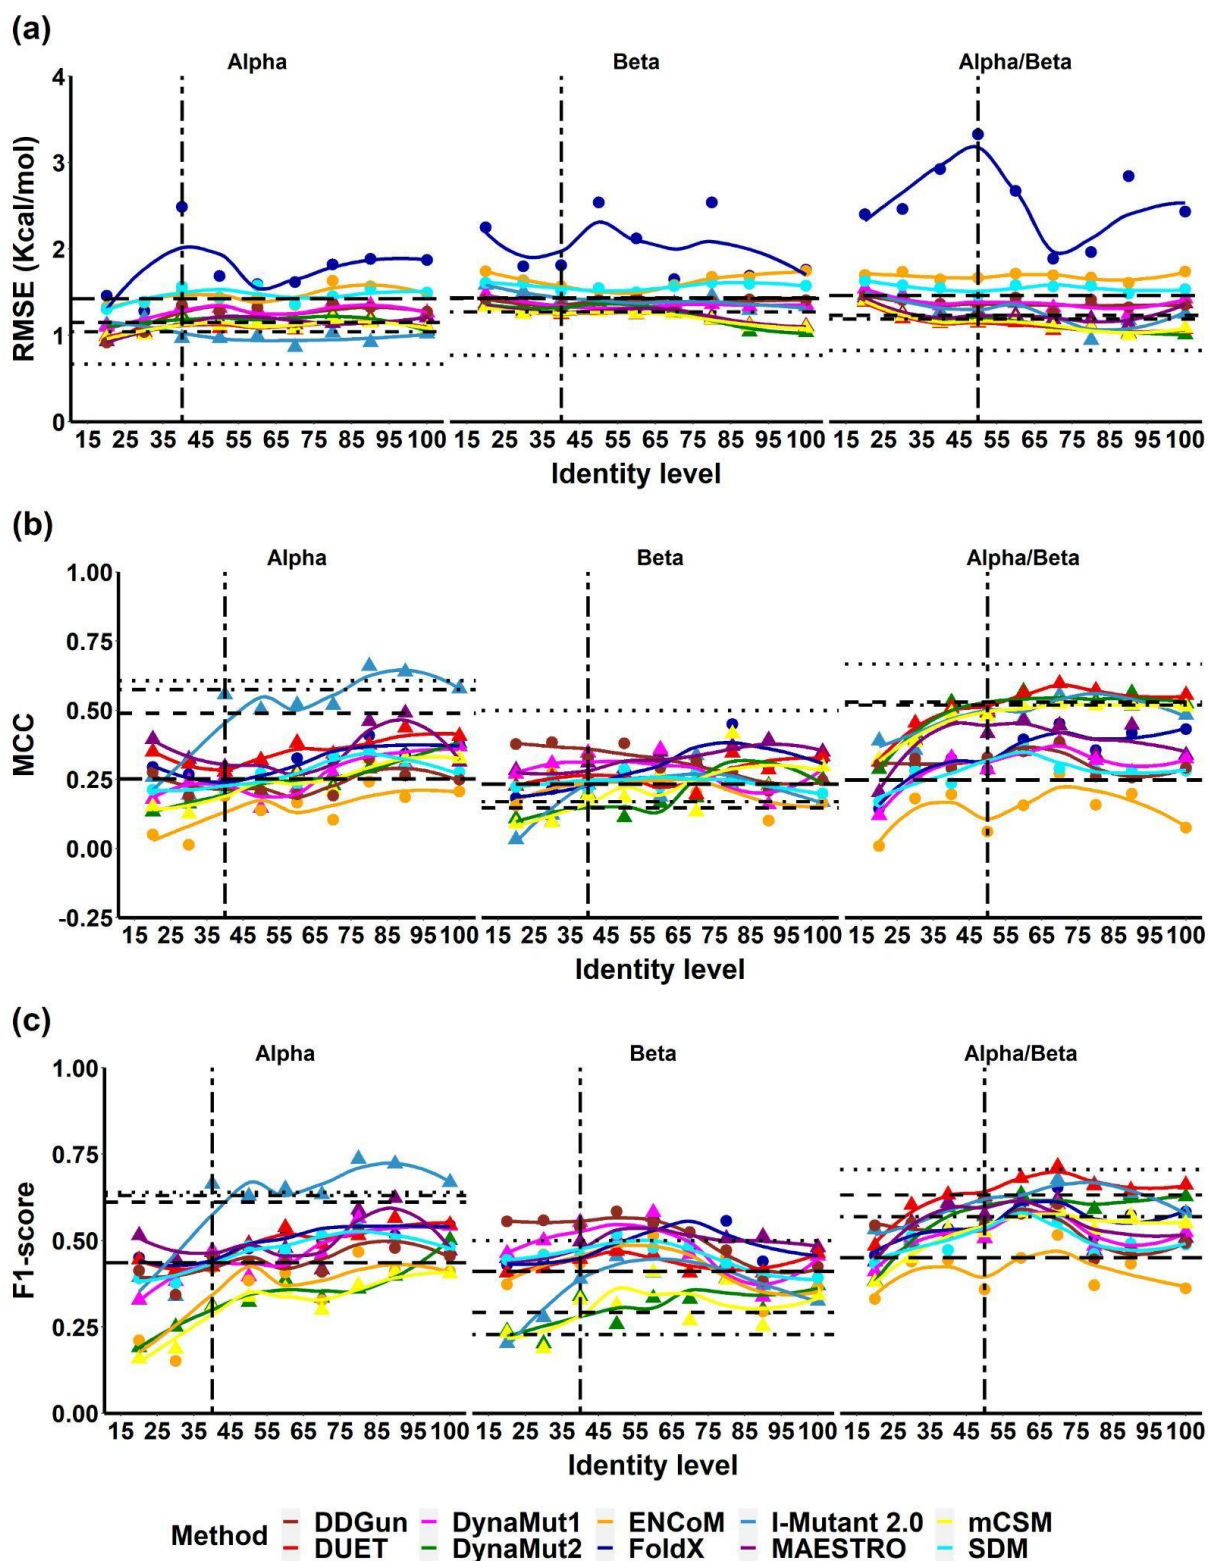

**Figure S7.** Performance of (a) RMSE, (b) MCC, and (c) F1-score of ten methods to predict mutation effects on protein stability with homology models as input structures on different secondary structure composition classified by the CATH.



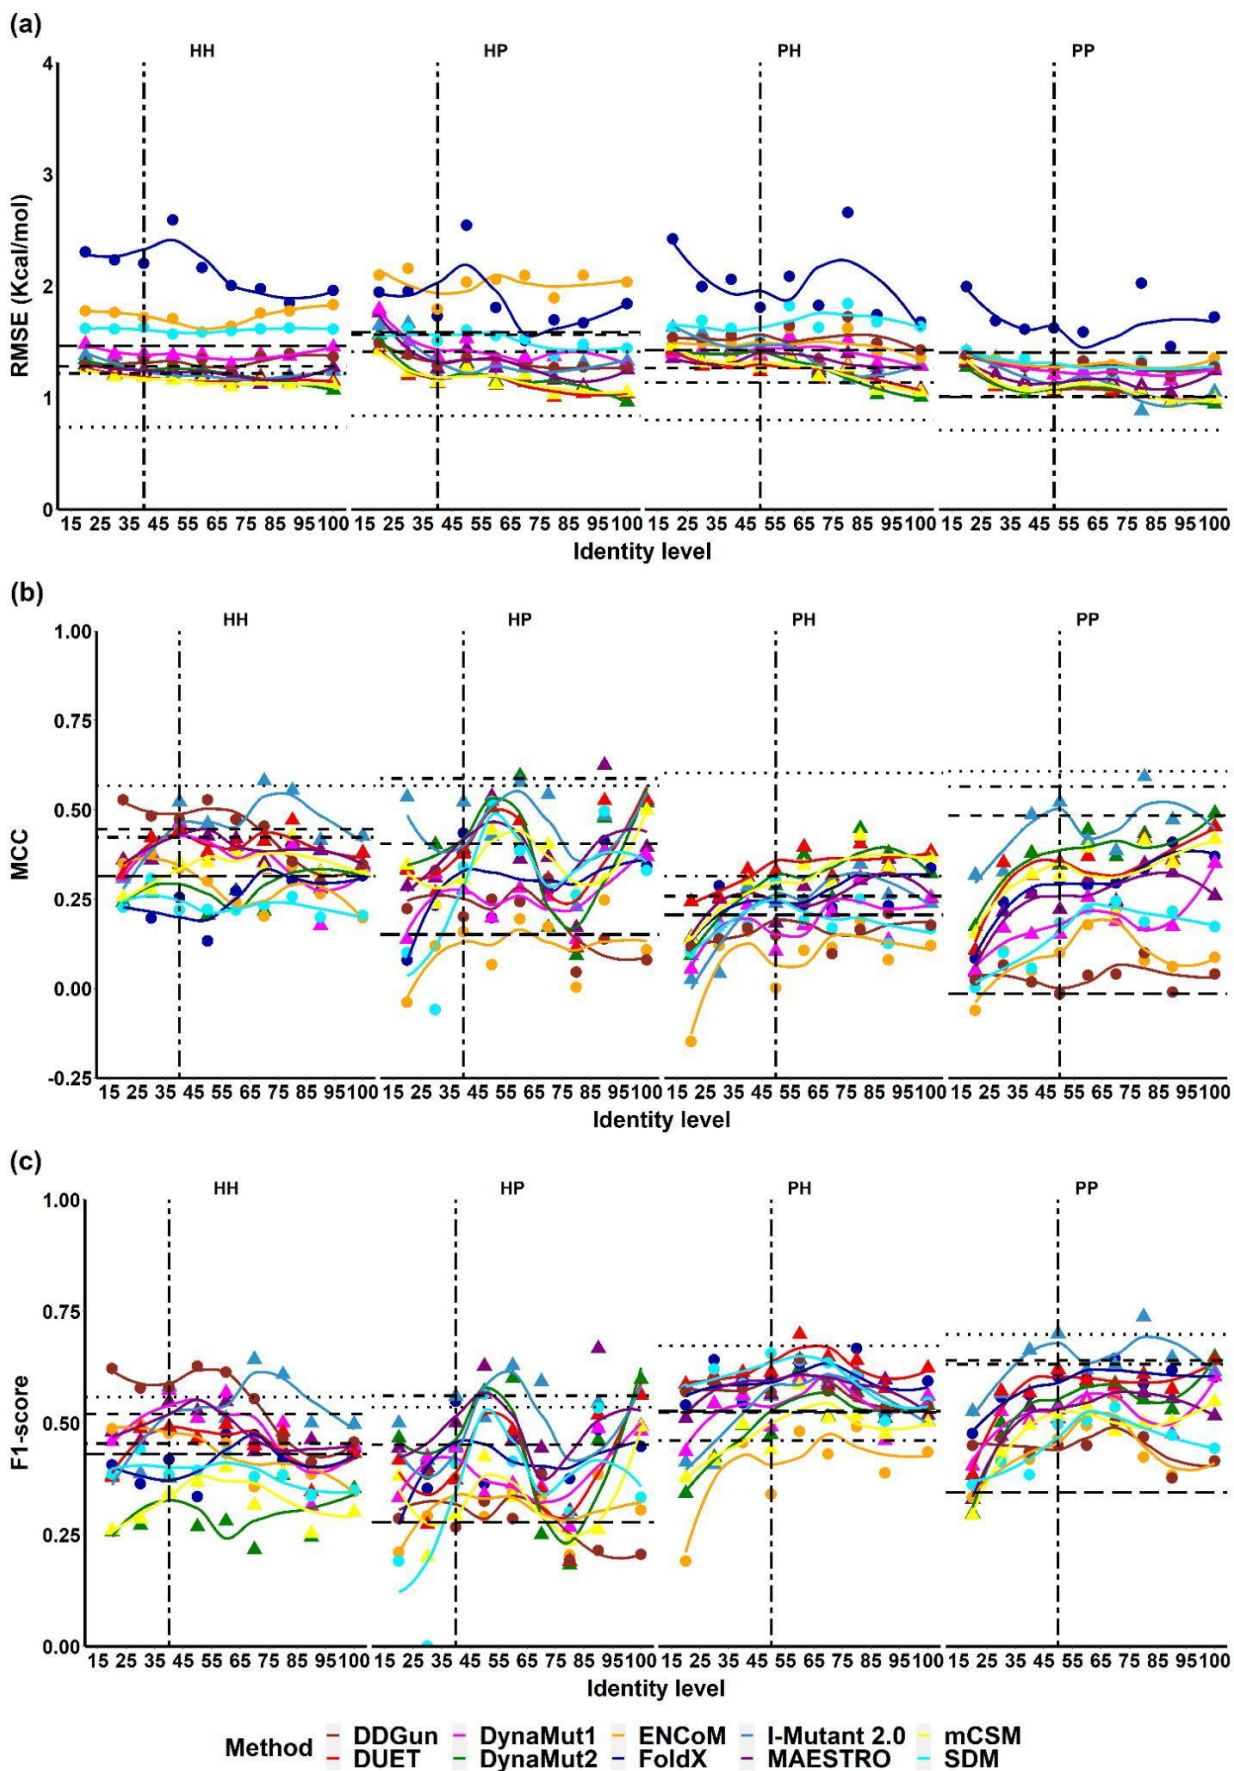

**Figure S8.** Performance trends based on (a) RMSE, (b) MCC and (c) F1-score for ten methods used to predict mutation effects on protein stability using homology models as input structures on different mutation types based on change of polarity.

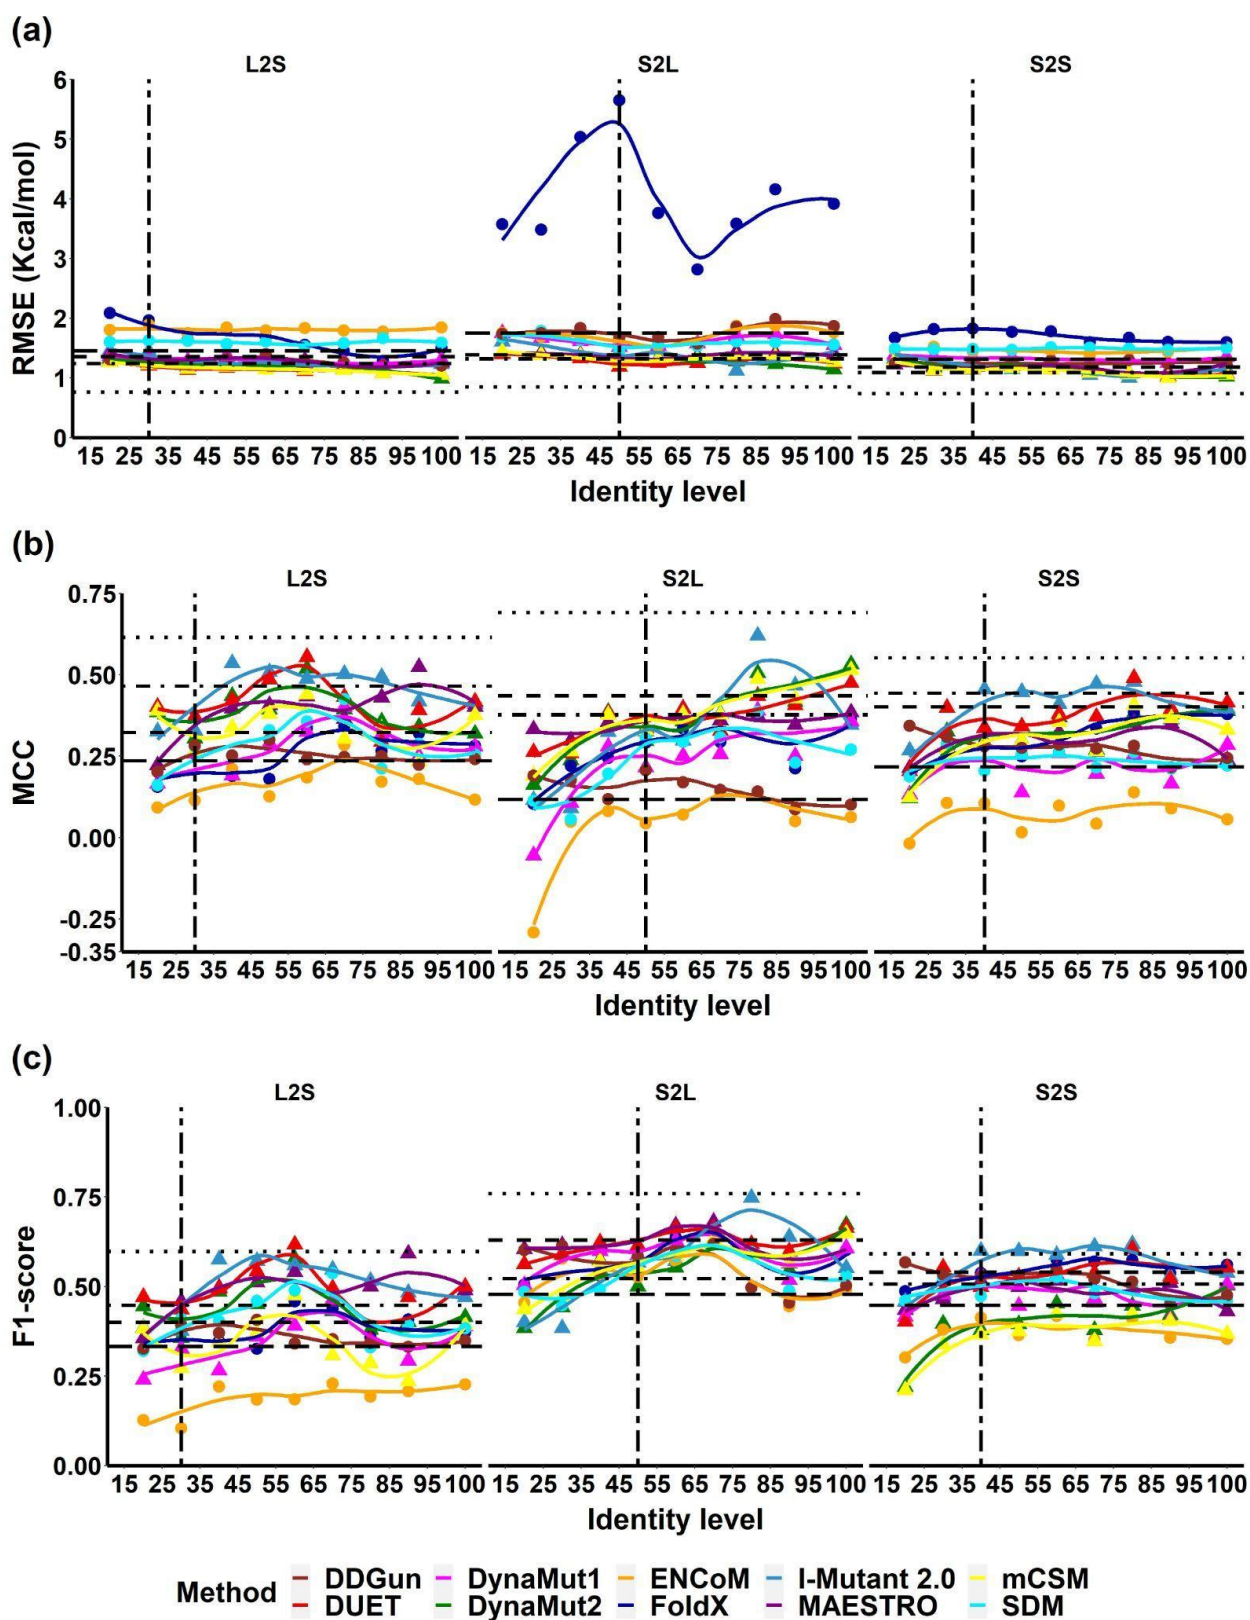

**Figure S9.** Performance trends based on (a) RMSE, (b) MCC and (c) F1-score for ten methods used to predict mutation effects on protein stability using homology models as input structure on different groups of change of residue volume.

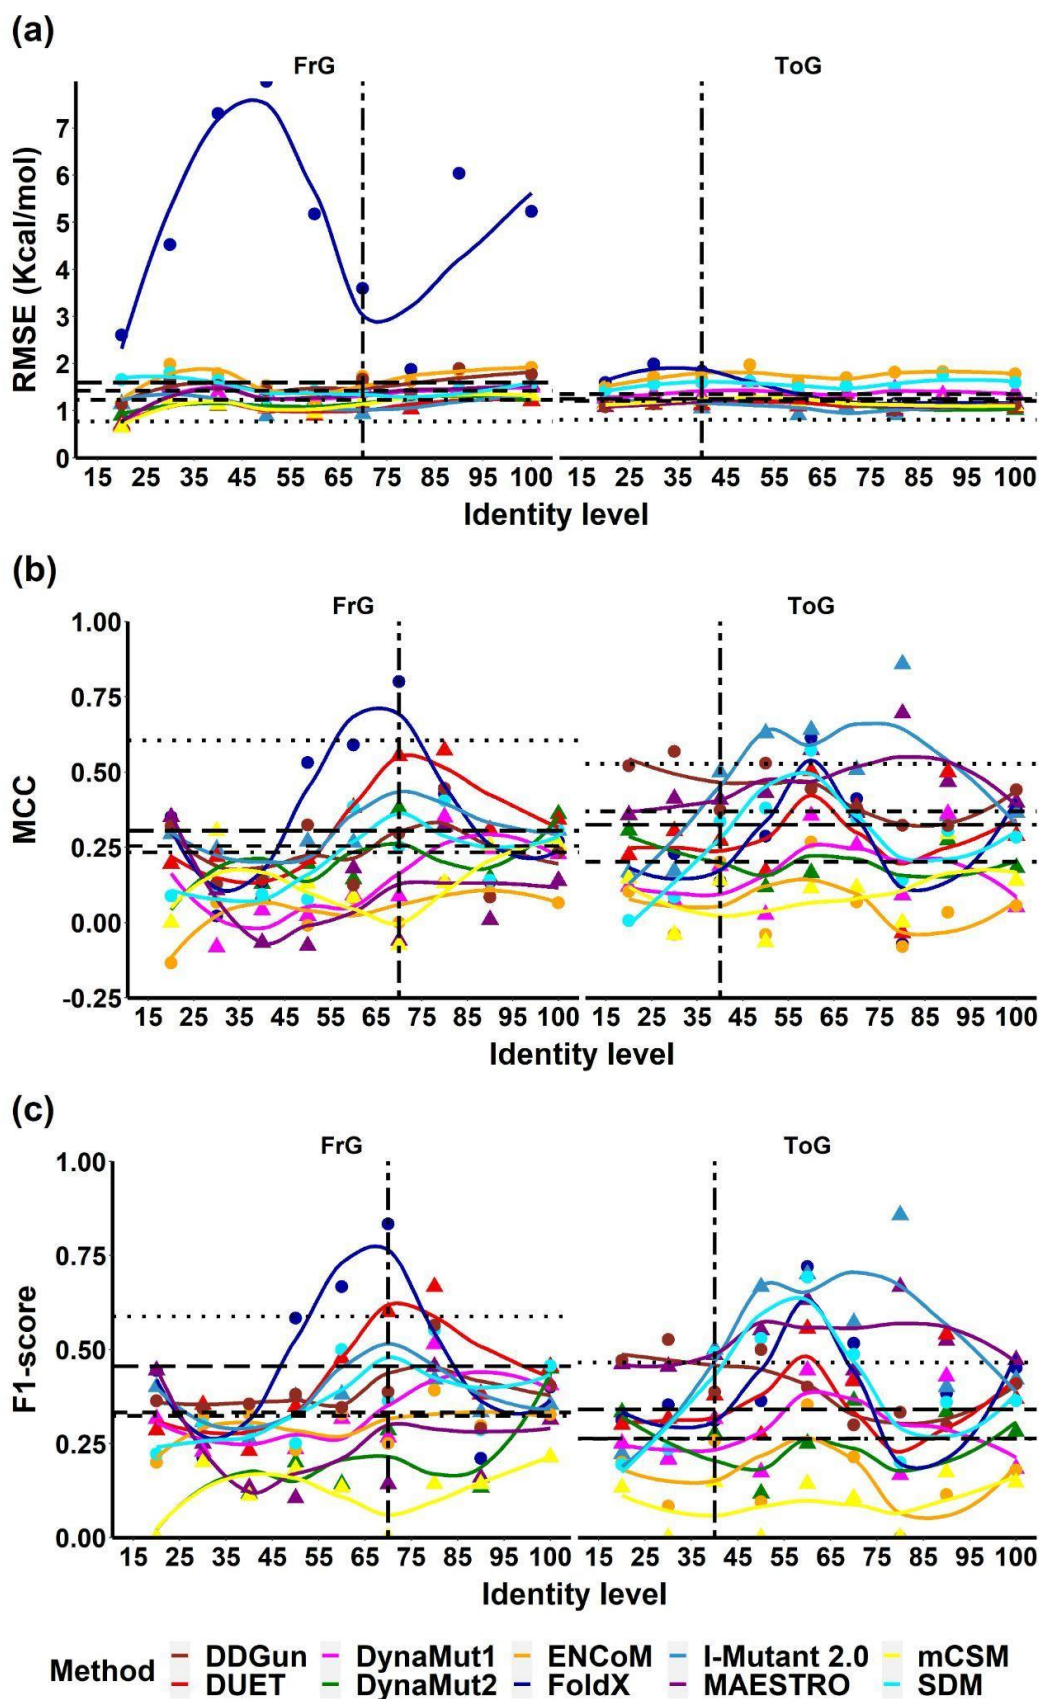

**Figure S10.** Performance trends based on (a) RMSE, (b) MCC and (c) F1-score for ten methods used to predict mutation effects on protein stability using homology models as input structure on different mutations related to Glycine.



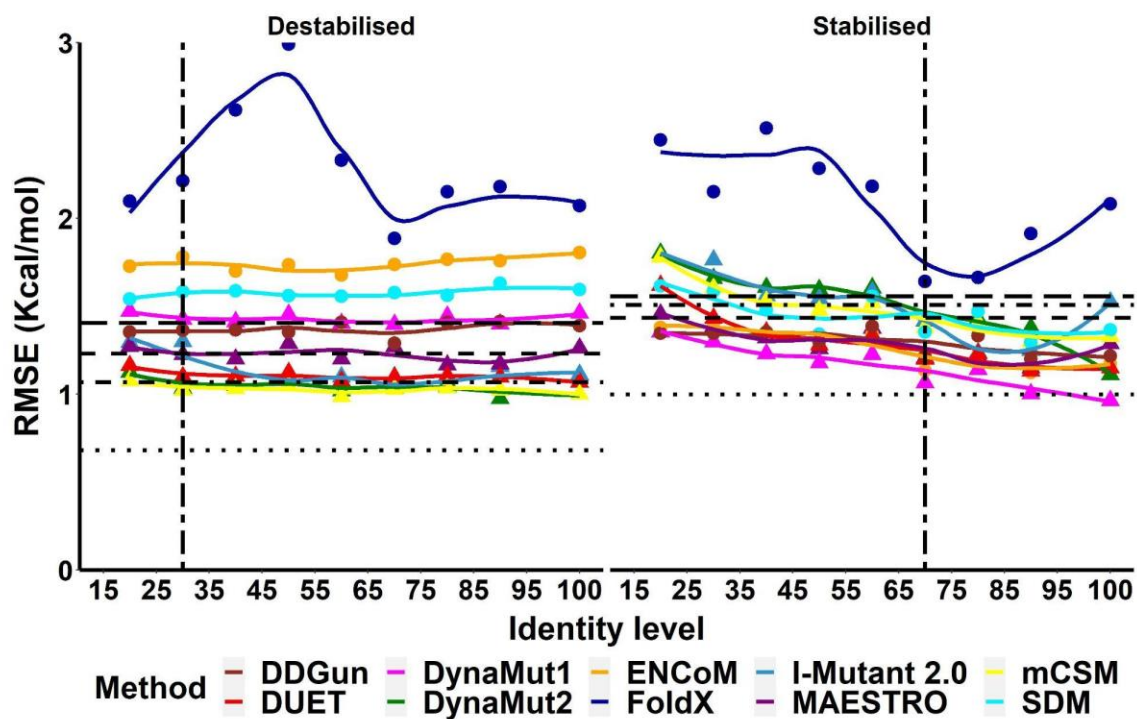

**Figure S11.** Performance trends based on RMSE for ten methods used to predict mutation effects on protein stability using homology models as input structure on different mutation effects on protein stability.
